## CORRECTION

# Correction: Implementation of Genomic Surveillance of SARS-CoV-2 in the Caribbean: Lessons learned for sustainability in resource-limited settings

Nikita S. D. Sahadeo, Soren Nicholls, Filipe R. R. Moreira, Áine O'Toole, Vernie Ramkissoon, Charles Whittaker, Verity Hill, John T. McCrone, Nicholas Mohammed, Anushka Ramjag, Arianne Brown Jordan, Sarah C. Hill, Risha Singh, Sue-Min Nathaniel-Girdharrie, Avery Hinds, Nuala Ramkissoon, Kris V. Parag, Naresh Nandram, Roshan Parasram, Zobida Khan-Mohammed, Lisa Edghill, Lisa Indar, Aisha Andrewin, Rhonda Sealey-Thomas, Pearl McMillan, Ayoola Oyinloye, Kenneth George, Irad Potter, John Lee, David Johnson, Shawn Charles, Narine Singh, Jacqueline Bisesor-McKenzie, Hazel Laws, Sharon Belmar-George, Simone Keizer-Beache, Sharra Greenaway-Duberry, Nadia Ashwood, Jerome E. Foster, Karla Georges, Rahul Naidu, Marsha Ivey, Stanley Giddings, Rajini Haraksingh, Adesh Ramsubhag, Jayaraj Jayaraman, Chinnaraja Chinnadurai, Christopher Oura, Oliver G. Pybus, Joy St. John, Gabriel Gonzalez-Escobar, Nuno R. Faria, Christine V. F. Carrington

In the Funding section, funding sources were omitted. The correct Funding Statement is: This work was supported by grants to C. V. F. Carrington from The University of the West Indies —Trinidad &Tobago Research Development Impact Fund (No. 26607–447524), Pan American Health Organization / World Health Organisation (PAHO/WHO; SCON2021-00379), Government of the Republic of Trinidad and Tobago Ministry of Health (He: 10/45/35 Vol 1) and the AHF Global Public Health Institute, and in-kind support from PAHO/WHO and the Caribbean Public Health Agency. Also, a Medical Research Council-Sao Paulo Research Foundation (FAPESP) CADDE partnership award (MR/S0195/1 and FAPESP 18/14389-0) and a Wellcome Trust and Royal Society (Sir Henry Dale Fellowship: 204311/Z/16/Z) to N. Faria. S. C. Hill acknowledges support of a Sir Henry Wellcome Postdoctoral Fellowship (Wellcome Trust grant number 220414/Z/20/Z). The funders had no role in study design, data collection and analysis, decision to publish, or preparation of the manuscript.

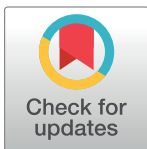

## OPEN ACCESS

**Citation:** Sahadeo NSD, Nicholls S, Moreira FRR, O'Toole Á, Ramkissoon V, Whittaker C, et al. (2023) Correction: Implementation of Genomic Surveillance of SARS-CoV-2 in the Caribbean: Lessons learned for sustainability in resource-limited settings. *PLOS Glob Public Health* 3(9): e0002393. <https://doi.org/10.1371/journal.pgph.0002393>

**Published:** September 11, 2023

**Copyright:** © 2023 Sahadeo et al. This is an open access article distributed under the terms of the [Creative Commons Attribution License](https://creativecommons.org/licenses/by/4.0/), which permits unrestricted use, distribution, and reproduction in any medium, provided the original author and source are credited.

## Reference

1. Sahadeo NSD, Nicholls S, Moreira FRR, O'Toole Á, Ramkissoon V, Whittaker C, et al. (2023) Implementation of genomic surveillance of SARS-CoV-2 in the Caribbean: Lessons learned for sustainability in resource-limited settings. *PLOS Glob Public Health* 3(2): e0001455. <https://doi.org/10.1371/journal.pgph.0001455> PMID: 36963002
